# Supplementary material for: Physical Analysis of SARS-CoV-2 Routes: from Primary Production and Emissions to Exposures and COVID-19 Infection
Source: Preprints.org preprint supplement (doi:10.20944/preprints202205.0234.v1), 2022-05-17
Supplement: Supplementary file 1 [file supplementary]

**SI-Tx Text Files Supporting Information**

Contents

[SI-T1 Definitions and Measurements 2](#_Toc87525314)

[SI-T2 Reference Data for Modelling 5](#_Toc87525315)

[SI-T3 Concentration and Exposure in a Closed Space with Emitting Persons, Ventilation, and Decay: Model Description 8](#_Toc87525316)

[SI-T4 Modelling Structure of Spreadsheet SI-W1 Visualized 9](#_Toc87525317)

[Experimental results 10](#_Toc87525318)

[SI-T4 Modelling in closed spaces, inside 11](#_Toc87525319)

[SI-T5 Modelling in open spaces, outside 13](#_Toc87525320)

[SI-T6 Constant Dilution per Distance at Different Wind Speeds 16](#_Toc87525321)

[SI-T6 Figure A. Peak Concentrations after Instantaneous Emission, by Wu et al. (2018) 17](#_Toc87525322)

[SI-T7 Detailed Model Description of Continuous Flow Model for Open-Air Gatherings 18](#_Toc87525323)

[SI-T8 Forty Potential Exposure Situations Evaluated 20](#_Toc87525324)

[SI-T9 Direct and Indirect Fluid and Solid Exposures 23](#_Toc87525325)

[Closed spaces fluid droplet concentrations & exposures (distance & frequency) 23](#_Toc87525326)

[Closed spaces solids to nose: stool and fomites (transport & frequency) 24](#_Toc87525327)

[Closed spaces solids to mouth: stool, fomites, and food (transport & frequency) 25](#_Toc87525328)

## SI-T1 Definitions and Measurements

**Aerosol**
An aerosol is an airborne particle, solid or fluid. Particles may remain airborne for some time. In the range from 10 to 50 micrometer (μm) they tend to fall within a second, travelling a short distance depending on kinetics, in the order of up to a meter. Under normal circumstances droplets smaller than 5μm to below 1μm will evaporate to *droplet nuclei*, in size depending on the non-virion material in the droplet. Behavior in the range from 10μm to 5μm will depend on humidity, temperature, and turbulence. In the range from 5μm down to nanometer level they can remain airborne for a longer time and then can travel a much longer distance while evaporating and after evaporation. The smallest stay airborne longest, up to several hours. Ultra-Fine Particles (UFPs, <100nm)), the size order of corona virions like SARS-CoV-2, stay airborne limited by decay mechanisms, physical and chemical. Airborne particle is a more neutral term then aerosol, avoiding (conflicting) definitions on what is counted. Droplets may include droplet nuclei, or not, and tend to exclude non-watery single virions in measurement.

**COVID-19 person**
A COVID-19 person is infected with viable SARS-CoV-2 virions, reproducing in its body, as primarily in the alveoli in the lungs and small intestines. Some replication can also be in the nose and sweat glands and in blood related internal infection spots. Viable virions may be measured in swabs; blood samples; exhales; and stool, usually indirectly by measuring the virion parts covered in PCR tests. When all viable virions have gone, the person stops to be a COVID-19 ill person, though some symptoms may endure, covered under the term ‘Long Covid’.
The infected person may remain asymptomatic, may still be asymptomatic, or may be symptomatic, with several criteria and combinations of criteria to establish the illness, as in the WHO COVID-19 definition of December 2020. It combines several criteria for several different situations see https://www.who.int/publications/i/item/WHO-2019-nCoV-Surveillance_Case_Definition-2020.2
Some COVID-19 definitions exclude asymptomatic persons, applying a double criterion, so reducing the number of cases, with quite some variation in which symptoms then may additionally be applied, see
https://www.who.int/news-room/commentaries/detail/transmission-of-sars-cov-2-implications-for-infection-prevention-precautions
The consequence of the encompassing definition used here is that a person with only a small intestines infection with SARS-CoV-2 (Severe Acute Respiratory Syndrome Corona Virus 2) may not have the SARS-CoV-2 pneumonia, the prime cause of hospitalization and death. We would prefer the more precise ‘SARS-2 Infected person’ over ‘COVID-19 (ill) person’ (and would have preferred a more neutral term for the SARS-CoV-2 virus itself). Some ambiguity seems unavoidable.
Our Standard Person has COVID19, with an alveolar infection with SARS-CoV-2.

**Airborne exposure**
Airborne exposure to SARS-CoV-2 virions here covers all virions inhaled, as airborne droplets, droplet nuclei, solids and single virions, as in (Niazi, Groth, Spann, & Johnson, 2020) p.2.
However, beware that experimental measurements of airborne concentrations tend to be gravity based catching droplets and heavier droplet nuclei only, and exclude single virions and mini-droplets and droplet nuclei. See for example the widely cited (Z.-D. Guo et al., 2020), being based on measuring airborne virions by gravity separation, in droplets larger than 1 or at best 0.5 micrometer.

**Droplets & Aerosols**Droplets are part of aerosols, solids the other part. Large droplets do not travel far and if inhaled cannot easily penetrate in the airways, certainly not deep. However, in normal circumstances droplets below 5-10μm evaporate to droplet nuclei, with a reduction of up to 95% by mass (Duguid, 1946; Gralton, Tovey, McLaws, & Rawlinson, 2011)). The 10μm diameter droplet has size of around 1700 μm3 which then reduces to 85μm3. With a diameter of 4.4μm they remain airborne for a longer time. That mass is still well over 40 thousand times the mass of a SARS-2 virion, including its surfactant-wetted surface.
Some authors separate droplets from aerosols at the boundary of 5μm. Larger than 5μm are droplets and smaller are aerosols, so (P. Z. Chen et al., 2020), line 54. However, solids can be larger than 5μm and watery droplets and wet droplet nuclei may be smaller than 5μm.
The desiccation time from 10μm to <5μm is below 1.5 seconds even in higher relative humidity circumstances (Chen et al., 2020) line 600-614. So, the domain between 5μm and 10μm is grey. Above 10μm droplets remain fluid till falling on objects mostly. Lab measurements often are based on aerosolization, producing different sizes of droplets.

**Measuring airborne virions**
Measurement of aerosols mostly uses apparatus based on gravity separation. Such apparatus cannot measure below 0.5 micrometer at best, see the survey by Research International (a producer) at https://www.resrchintl.com/Documents/Air-Samplers-Comparison-060414.pdf, and the relevant page printed at the end of this document, third row. They cannot measure mini-droplets and smaller droplet nuclei, let alone single SARS-CoV-2 virions, at 140 nanometers. These smaller aerosols are in the outflow of such apparatus and are not measured. Beware, that the droplet or droplet nucleus of 4.4μm has a mass well over 40,000 (!!) times the mass of a single SARS-virion.
For measuring the airborne single virions, they must be extracted from that outflow. This requires complex air bubbling systems through water with then separation, or directly passing the virions to an adhesive growth medium. Establishing just the existence of viable virions is easier and has been done for SARS-1 already. Much more complex configurations are required for the quantification of SARS virion flows and concentrations, see (Lednicky et al., 2020; Pan et al., 2016).

**Measuring numbers of virions emitted**

As direct measurement of viable virions is extremely tedious, so indirect measurements are used. They are mostly based on some version of PCR test, analyzing fluids as extracted from nose and throat in a swab, and now sometimes anal. These tests can indicate the number of some virion RNA parts present, giving a clear indication that the virion had been produced. Quantifications of emissions per exhale or hour are mostly based on these results, see most extensively (Ma et al., 2020). These indirect measurements have a wide range of intervening variables which mostly cannot be quantified or reduced. These include:
-variable transport speed of epithelial mucus to the throat
-variable volume of mucus production
-variable cleaning of mucus from lungs and throat before test
-variable production of sneeze in the nose
-variable speed of epithelial transport from nose to throat
-variable cleaning of sneeze before test (reduced by active sneezing before test)
-variable mixing of sneeze and mucus in throat and end of nose.
PCR-based quantitative measurements of virions emissions therefor have a limited validity for virion quantification, not easily represented in uncertainty analysis. They are ‘rough estimates’.

Newer methods separating virions include a dilution procedure. After a certain number of dilution steps no new infection of the lab cells take place anymore, so the previous test step sets the unit of quantification. There are many technical details leading to different outcomes, one of them is that SARS-2 virions may come in clusters, and that other viruses and bacteria (below 0.5 micrometer) may infect the growth medium.

**References (also present in the main Bibliography)**

Chen, P. Z., Bobrovitz, N., Premji, Z., Koopmans, M., Fisman, D. N., & Gu, F. X. (2020). Heterogeneity in transmissibility and shedding SARS-CoV-2 via droplets and aerosols. *medRxiv*, 2020.2010.2013.20212233. doi:10.1101/2020.10.13.20212233

Duguid, J. (1946). The size and the duration of air-carriage of respiratory droplets and droplet-nuclei. *Epidemiology & Infection, 44*(6), 471-479.

Gralton, J., Tovey, E., McLaws, M.-L., & Rawlinson, W. D. (2011). The role of particle size in aerosolised pathogen transmission: A review. *Journal of Infection, 62*(1), 1-13. doi:https://doi.org/10.1016/j.jinf.2010.11.010

Guo, Z.-D., Wang, Z.-Y., Zhang, S.-F., Li, X., Li, L., Li, C., . . . Chi, X.-Y. (2020). Aerosol and surface distribution of severe acute respiratory syndrome coronavirus 2 in hospital wards, Wuhan, China, 2020. *Emerg Infect Dis, 26*(7).

Lednicky, J. A., Lauzardo, M., Fan, Z. H., Jutla, A., Tilly, T. B., Gangwar, M., . . . Wu, C.-Y. (2020). Viable SARS-CoV-2 in the air of a hospital room with COVID-19 patients. *International Journal of Infectious Diseases, 100*, 476-482. doi:https://doi.org/10.1016/j.ijid.2020.09.025

Ma, J., Qi, X., Chen, H., Li, X., Zhang, Z., Wang, H., . . . Morawska, L. (2020). Coronavirus Disease 2019 Patients in Earlier Stages Exhaled Millions of Severe Acute Respiratory Syndrome Coronavirus 2 Per Hour. *Clinical Infectious Diseases*. doi:https://doi.org/10.1093/cid/ciaa1283

Niazi, S., Groth, R., Spann, K., & Johnson, G. R. (2020). The role of respiratory droplet physicochemistry in limiting and promoting the airborne transmission of human coronaviruses: A critical review. *Environmental Pollution*, 115767. doi:https://doi.org/10.1016/j.envpol.2020.115767

Pan, M., Eiguren‐Fernandez, A., Hsieh, H., Afshar‐Mohajer, N., Hering, S., Lednicky, J., . . . Wu, C. Y. (2016). Efficient collection of viable virus aerosol through laminar‐flow, water‐based condensational particle growth. *Journal of applied microbiology, 120*(3), 805-815.


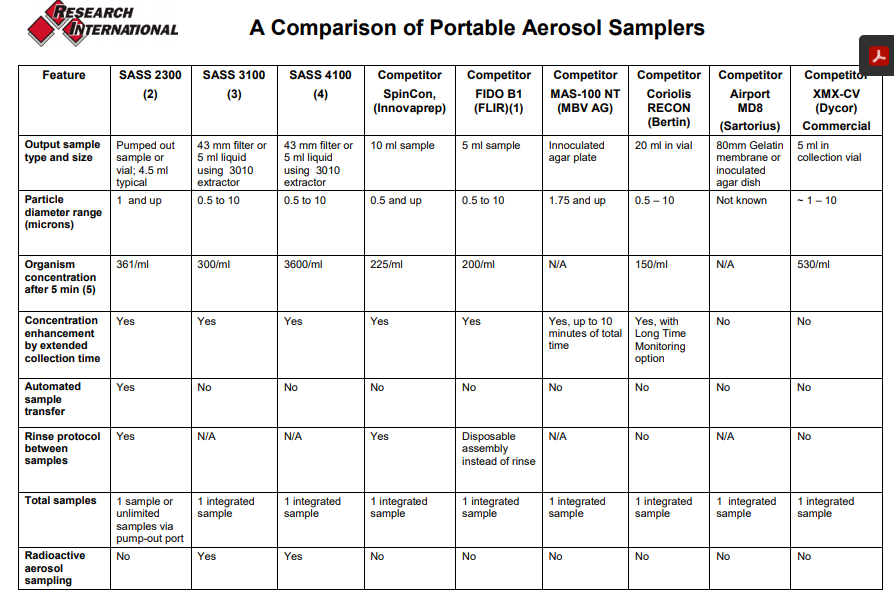


## SI-T2 Reference Data for Modelling

**Room size**

Standard: 100m3. Example: 3.33 high, 30m2. Size 5mx6m

Standard room with 5 emitting persons is equivalent to one such person in a 20m3 room. Example 2.5m high, 8m2. Size 2.7mx3m

**Person numbers in standard room**

5 SARS-2 emitting persons in 100m3 room

At 1m2 per person, as in a full restaurant, there may be 30 persons, of which 25 not infected, and 16.6% infected.

**1-Person emissions**

100 000 virions per hour, doubling every 28 hours (~2.5% per hour) till SARS-2 specific defenses develop.

Virions exhales are linear scalable in all scenarios.

Number of tidal exhalations: 1000 per hour. Tidal flow 0.5L/per exhale, 0.5m3/hour.

Higher or lower tidal flows and volumes don’t influence primary production in the alveoli nor do coughs and sneezes or singing or talking.

**High emission sensitivity**

- 500 000 virions per hour

- 10 emitting persons per 100m3 instead of 5 🡺 2 times higher concentration and exposure than reference.

**Virion decay**

Indoors HalfLife of 2 hours (HL120) as reference, with sensitivity analysis at HL60 and HL180.

Decay outside is faster, estimated between 15 minutes (sunny) and 30 minutes as used for outside quantification. The sensitivity analysis for half-life minutes: 15; 30; 60; 180, see SI-W3 to SI-W7.

**Room ventilation rates (VRs)**

Range covered is between VR0.1 and VR60. For special situations higher empirical VRs exist higher VR norms exist, as for ICUs in some countries: VR30. Natural ventilation with high windows is up to VR60. The range of VRs used for quantifications is:

0.1; 0.5; 1; 2; 5; 10; 20; 40; 60, with zero used for analytic purposes.

**Concentration build-up**

In closed spaces concentration builds up in time by consecutive exponentially rising exhalations of the SARS-2 virus emitting persons. Their emissions rise, so we assume, till specific defenses become active. We cover 48 hours in modelling at most.

The number of virions is reduced in time by dilution and decay, both exponential processes related to the concentration. In closed rooms dilution is determined by ventilation, with virion decay important in concentration reduction at lower ventilation rates.

In open spaces dilution is dominant. There is no concentration build-up due to wind transport and turbulence at different altitudes and high levels of decay in virtually all situations.

**Ventilation, active**

Ventilation assumes instantaneous mixing of inflowing virus-free air, with such mixed air taken out. Ventilation may be with fresh air or by equivalent filtering.

For larger spaces this mixing assumption becomes increasingly inadequate, with flow ventilation then more adequate. Flow ventilation may possibly be more efficient but is extremely location-dependent, not modelled here.

**Ventilation natural**

Natural ventilation is highly variable. Density difference inside-outside is a main determining factor, highest with high temperature and high absolute humidity inside and cold dry air outside, and vice versa. When inside and outside air densities are equal, only wind kinetics create ventilation, possibly nearing a ventilation rate of zero (<VR0.1). With low ventilation rates inversion layers may result in closed rooms, with locally even more extreme concentrations building up.
**Potential exposure**

Airborne exposure is the sum of inhalations of a certain concentration, covering the sum of single virions and droplet nuclei.

Contact exposure, fixed and fluid, is quantified, where possible, by number of the virions involved.

**1-Person inhalation for exposure**

Inhalation is by 0.5L per tidal flow, 0.5m3/hour. Filtering effect of tidal flows of persons present is left out of account.

**Concentration times in closed spaces**

The following minutes are quantified in concentration tables: 1; 5; 15; 60; 120; 240; 600; 720; 1320; 1440; 2880.

**Exposure periods**

For inside exposure, periods are set for staying in an infected room, entered at a time of concentration build-up by the standard ill persons present.

Representative exposures start at minute 0; 60; 240; 480; 600; 1320; 2760. They last for 1; 5; 15; 60; 120 minutes. Additionally: 0 to 240; 960; 1440; and 2880 minutes are specified.

A sensitivity analysis on exposures is made for half-life of minutes 30; 60 and 180, for all periods and all VRs, with full data sets in SI-W14.

The duration of outside exposure is set at a variable number of inhalations in the exhale of one or more SARS-CoV-2 infected persons, at standard distance of 1m and 1.5m.

**Potential infection**

The number of inhaled virions required for a 50% chance on alveolar infection is set at 316 by (Lelieveld et al., 2020), p.7, as the logarithmic mean of the literature estimates ranging from 100 to 1000 virions they surveyed. This number of 316 viable virions corresponds to a virus titer of about 220 plaque forming units (PFUs) as used in virology (virions number times 0.7). We use **350** virions as a reference number for potential infection: 100 as a near absolute minimum for infection and 1000 and higher as a minimum for highly probable infection.

**Reference**

Lelieveld, J., Helleis, F., Borrmann, S., Cheng, Y., Drewnick, F., Haug, G., . . . Pöschl, U. (2020). Model Calculations of Aerosol Transmission and Infection Risk of COVID-19 in Indoor Environments. *International Journal of Environmental Research and Public Health, 17*(21), 8114.

## SI-T3 Concentration and Exposure in a Closed Space with Emitting Persons, Ventilation, and Decay: Model Description

**Model developed in cooperation with Nico van Loon and Jan van Kasteel.**

The first part of the model is based on three processes: The emission by the infected person, as the immission to the location; virion decay, and dilution by ventilation:

- U: the immitted virions per hour, considered to be an exponential function, with a start value of A; immission is doubled after r minutes.

- H: the decay of virions, measured as HalfLife of h minutes, after which only half the virions are still active, is defined as a negative exponential function, representing the fraction of virions still active at moment t, with a decay constant

- V: ventilation of the location, with a ventilation rate of v times the volume of the location per hour, also defined as a negative exponential function, representing the fraction of virions still present in the room at moment t, with a ventilation constant .

The total decline D is the sum of H and V with a decline constant .

The convolution of the immission function U and the decay function D results in S, the stock of virions present in the room and active at time t, under regimes of HalfLife h and ventilation rate v.

The second part of the model specifies how many virions are inhaled by a person present. The Inhalation E over a given timespan is defined as the integral of S over the timespan, divided by m, the volume of the space, and multiplied by b, the volume of breath taken, to arrive at the inhalation of virions in the timespan.

In formulas:

Immission:

HalfLife:

Ventilation:

Decline:

Stock of virions:

Inhalation:

We assume as standards a production doubling time r = 1680 minutes, HalfLife h = 120 minutes, room volume m = 20 cubic meters. The ventilation rate is varied. Doubling time and HalfLife are varied in sensitivity analysis. One emitting person is present. The emission by the infected person in the first hour is 100,000 virions, the Standard Person. Inhalation breath volume is assumed to be ½ cubic meter per hour (60 minutes, 1000 tidal breath flows) by each person present. Filtering effect of breathing is neglected.

Programming is in wxMaxima, version 20.06.6, under Ubuntu 20.04.

SI-T4 Modelling Structure of Spreadsheet SI-W1 Visualized

**SI-T5 Exhales–Exposures Modelling Options, Open and Closed Spaces**

### Experimental results

Exhales have been studied in experiments, with some modelling conclusions. Experiments give results as overlapping series of pictures of moving particles or as pressure differences. The particles may be experimental using manikins in lab situations, or may involve real persons, still mostly in lab situations. We surveyed the following papers: (Bourouiba, 2020; Bourouiba, Dehandschoewercker, & Bush, 2014; Gupta, Lin, & Chen, 2010; Jones et al., 2020; Olmedo, Nielsen, de Adana, Grzelecki, & Jensen, 2010; Scharfman, Techet, Bush, & Bourouiba, 2016; Vuorinen et al., 2020; Xu, Nielsen, Liu, Jensen, & Gong, 2017).

Experiments converge in that humid and warm exhales spread out while reducing speed, in an upward bended curved cone with an opening of 40 degrees. At 50 cm the exhale comes close to stand-still, with a remaining speed of 25cm/s. How they spread further remains quite open, a subject approached here with preliminary quantifications. This analysis covers normal exhales inside in still air, see the picture by Xu et al., (2017), in Figure A.

Bursts first dilute faster due to their high turbulence and then have a larger volume already at 1 meter distance from the mouth, see the Figure in (Bourouiba, 2020). It probably refers to very still air of a high temperature and high humidity and hence no buoyancy of the exhale (we asked the author, but no answer was given in content: ’no time’). The course of falling droplets is well depicted there.

None of the authors uses a mass balance. But what is exhaled must first be produced. The higher exhales at speaking, singing, sneezing, and coughing may be true apiece. They don’t increase primary production in the alveoli, however. The time periods covered are so short, except with Vuorinen et al. (2020) going up to one hour only, that emission growth and decay do not play a role.

## SI-T4 Modelling in closed spaces, inside

The core question to be answered is how the exhale spreads further, after the 50cm covered in the experimental literature. The forces at work are the remaining speed and buoyancy of the exhale, and the amount of disturbance in the air where the exhale expands. For the analysis of one person exhaling towards one person inhaling its exhale we use up to two meters distance. Beyond that distance the dilution becomes extreme, with exposures very limited even for longer periods of inhaling from another person. Then the room model with ventilation becomes more relevant. This also holds for longer time periods than a few minutes (6 minutes = 100 ex/inhales).

We expand the 40 degrees cone model to longer distances, with several detailing options. Most simple is the single sphere or oval of exhales, see Figure 7 in (Bourouiba et al., 2014). Moving in the cone then gives the decreasing concentration, from 50, to 100, to 150, to 200cm they are for 100 direct inhales 198, 25, 7, and 3 virions respectively, see the first variant in the adjoining excel file ‘Virions in exhales’. Normal exhales last 1.6 seconds and are a wisp, with a pause of 2 seconds to the next exhale and inhales similar. The sphere-in-cone model gives a serious overestimation as it assumes that the inhaler inhales only from the virions sphere. Still, we use this worst case in our computations inside. The wisp model is used for outside analysis, with 4 emitters at a 100m2 space such as a terrace, and with different wind speeds.

For the cough/sneeze burst we have two options, the cone model multiplying the exhale by 5 to 500 virions, (1) in the excel, and the picture model from Bourouiba (2020) with after 1 meter a modest cone of 10 degrees following, nr (2) in the excel. Results are 1.5 virion at 100cm, 1.2 at 150cm, and 1.0 at 200cm. The burst dilutes extremely.

**Figure A, Exhales depicted**

From Xu et al., 2014, p.194, with written permission.

The thin curved lines depict the expansion of the exhale per unit of time, 1/15 or 2/15 second. Frames a and b give the sidewards sitting/standing view; c and d the lying position; and e and f the sitting/standing position seen from above.

## SI-T5 Modelling in open spaces, outside

Outside models and measurements at the scale level of exhales up to 15 meters are absent.

**The reference situation**

**Input data**

- Persons exhaling are Standard Persons. They exhale half a liter in each tidal flow, as the inhaling person does at inhalation. There are 1000 tidal flows per hour, with 100 virions per exhale, 100,000 virions per hour.
- The wind is blowing regularly at 1m/second.
- The exhale duration is set at 1.8 second, half the tidal flow of an average person at rest.
- The first part of the single exhale of 100 virions has moved 1.8 meters before the last part of that exhale comes into the air. It has moved 1.8 meter before the first part of the next exhale comes.
- The second Exhaler starts exhaling 1.8 seconds after the first Exhaler, when Exhaler one’s first exhale has just passed. So the Exhaler 2 flows fill the gaps in the flows of Exhaler 1.

**Modelling situation and assumptions**

- The flows of exhaler one and exhaler two are equal, set at 1 meter distance downwind.
- The wind transport of exhaled virions is independent from the exhale kinetics.
- The exhale kinetics halt nearly within half a meter, fully within 75cm. The transport effect in the wind direction due to exhale kinetics is abstracted from, set at zero. Each exhale particle then moves with the speed of the wind only, in the direction of the wind. Disturbances create the dilution over distance.
- The dilution over distance follows two independent cone dilution mechanisms, with two cones superimposed. The first 75cm has an exhale kinetics based cone of ~40 degrees, derived from exhales literature see also the figures by (Xu et al., 2017). The wind cone has an opening of ~10 degrees, based on data by (Wu et al., 2018). In the first 75cm, the combined cone has an opening of ~45 degrees (adding tangents). Thereafter, the combined cone opens further at 10 degrees. After this operation, time is out of the equations, only distance remaining.
- All flows are taken horizontally from Exhalers and to the nose/mouth of the exposed inhaler, leaving out vertical transport. This leads to an unknown but substantial overestimation of exposures.
- Dilution is perpendicular to the flow direction only.
- Till distance below 2.25cm (175cm + 50cm) the concentration is flipping up and down, only its average relevant for longer term exposure. Thereafter the dilution is the 10 degrees for each exhaler. At a given distance, the exhale from exhaler 1 is slightly more diluted than from exhaler 2; the 1-meter difference, abstracted from
- The concentration of both exhalers is added up, combined in the overall mixing cone, after 3.6m expanding only at 10 degrees.

**Sensitivity**

- Lifting the zero transport exhales assumption would increase the dilution over the first 50cm and would decrease the exposures somewhat.
- Lifting the perpendicular assumption would add mixing in the flow direction but would not add to the virions flow volume. That added detail, complex to model, would be irrelevant for exposures.
- Lifting the synchronization assumption would show more complex ups and downs at short distance, with the ~10 degrees cone taking over after 3.6 meter. The synchronal tidal flows in alteration show an average over these more complex non-synchronal differences. As the model is to indicate exposures for a longer stay at the terrace the synchronization assumption is justified.

**Three modelling approaches**

We follow three modelling approaches. Only normal exhales are considered; the incidental cough-sneeze can be approached by the inside version. The base model is the sophisticated continuous dispersion and exposure model, cone model number 1. Two other models function as a rough check on the magnitude of results. They are cone model number 2, a spreadsheet model with sphere expansion, and a virtual room model. See the outcomes in the excel files in SI-W19.

**Cone model: exhale cone and wind cone superimposed**

The cone models have the inside sphere model as a starting point, but only till 50cm here, with wind dispersion superimposed on that cone and then continuing. The inside cone has been measured well up to 50cm but then extends with 25cm/s continuing in the 40 degrees cone. We cap the exhale expansion in the 40 degrees cone at 75cm, the further movement and dilution created by wind only.

For the wind cone we used an empirical data set on concentration measurement at the nearest available scale level of over 100m, with three measurement points at distances of 60 meter (Wu, Zhu, Zhen, Zhang, & Lu, 2018). Our analysis of that data set shows a roughly constant cone, as the dilution per distance increases independently of the wind speed, see the analysis on the data of (Wu et al., 2018) in SI-W20. Wind turbulence resulting is a fraction of the short distance exhaling turbulence only, creating a constant but much smaller cone opening of 10o instead of 40o.

Results are given for 2 exhaling persons while the inhaling person stands in line with the exhalers and the wind, a worst case. One must stand close (1-2m) and for a long time (4 hours) to receive a still low infectious exposure.

**Continuous exposure model**

The continuous exposure model has been developed in Gnuplot, Version 5.2.1. See the detailed description in SI-T7. Results are in Table 2 and Figure 4 in the main text.

**Large cone sections model**

See the description and results in SI-W19.

**Virtual room model**

The virtual room model specifies the square as a room, open to at least three sides and to the sky. With a low wind of 1m/s there is fully fresh air every 10 seconds. VR (= ACH) of 360 would result, not requiring mixing. We use VR60, with a sensitivity test at VR40. In a well filled restaurant there may be 100 persons, 1/m2. Next, there are 5% COVID19 ill exhaling persons, 5 exhaling persons on the 100m2 terrace.

The virtual room is 100m2 by 5 meter high = 500m3. Standard number of ill persons is 5 per 100m3. That is a factor 5 lower inflow as compared to our Standard room. Finally, we use HL30 for outside HalfLife, which however has hardly an effect relative to standard HL120.

Results show a very low exposure load. For the 4 hours period of stay numbers double (40; 28; 26) still clearly in the green domain. Exposure is distance-independent

|  |  |  |  |  | 4 hours |
| --- | --- | --- | --- | --- | --- |
|  |  |  | start time, |  | virtual |
|  |  |  | duration |  | room |
| **Terrace outside "room model"** | | HL30 | t0,240 | VR60 | **33** |
| **Terrace outside "room model"** | | HL30 | t60,240 | VR60 | **34** |
| **Terrace outside "room model"** | | HL30 | t60,240 | VR40 | **50** |

**Outcomes for the three terrace models combined**

The continuous cone model is more abstract but also more consistent. Outcomes with the coarse cone-sections model are in the same order of magnitude.

The outcomes for the room model for 4 hours are in line with the “average” distance domain of the cones model. Combined the models support the overall outcomes as being in the green domain, hardly or no chance on infectious exposures. This holds for the low-chance situation of being in the flows of two exhaling persons standing close-by in line with the wind. The distance between persons is measured mid-head. So 75cm corresponds to 50cm face-to-face, unusually close.

**Conclusion**

The opening cone implied in the maximum concentration reduction is roughly constant,

independent from the speed of the wind, following data by Wu et al, see SI-T6. A stronger wind might create so much more turbulence to just compensate for the transport effect of wind speed. The measurements by Wu et al. were made to assess the risk of VOC-concentrations, not focused on the cone issue. That result came from our secondary analysis of their measurement data.

## SI-T6 Constant Dilution per Distance at Different Wind Speeds

**Secondary analysis of data by Wu et al. (2018)**

Used with consent of the authors.

| **Peak concentrations for 3 wind speeds and 3 measurement points** | | | | | | | |
| --- | --- | --- | --- | --- | --- | --- | --- |
| **Instantaneous production of a gas cloud** | | | | | | | |
| **Concentration reduction along three measurement locations (L)** | | | | | | | |
|  |  |  |  | **Concentrations remaining, shares** | | | |
|  |  |  |  | **L2/L1 and** |  |  |  |
| **Windspeed 10m/s** | | **Conc.** | **Time** | **L3/L2** | **is L3/L1** |  |  |
|  | L1 | 0.2950 | 7.1 |  |  |  |  |
| Distance: | 60.8m | 0.1230 | 5.5 | **0.583051** |  |  |  |
|  | L2 | 0.1720 | 12.6 |  | **0.447458** |  |  |
| Distance: | 60.8m | 0.0400 | 5.5 | **0.767442** |  |  |  |
|  | L3 | 0.1320 | 18.1 |  |  |  |  |
| **Windspeed 5m/s** | |  |  |  |  |  |  |
|  | L1 | 0.2100 | 9.7 |  |  |  |  |
| Distance: | 60.8m | 0.0980 | 9.0 | **0.533333** |  |  |  |
|  | L2 | 0.1120 | 18.7 |  | **0.438095** |  |  |
| Distance: | 60.8m | 0.0200 | 10.1 | **0.821429** |  |  |  |
|  | L3 | 0.0920 | 28.8 |  |  |  |  |
| **Windspeed 2.4m/s** | | |  |  |  |  |  |
|  | L1 | 0.1480 | 12.9 |  |  |  |  |
| Distance: | 60.8m | 0.0662 | 12.7 | **0.552703** |  |  |  |
|  | L2 | 0.0818 | 25.6 |  | **0.405405** |  |  |
| Distance: | 60.8m | 0.0218 | 16.6 | **0.733496** |  |  |  |
|  | L3 | 0.0600 | 42.2 |  |  |  |  |
| **Source:** |  |  |  |  |  |  |  |
| Wu, W., Zhu, K., Zhen, C., Zhang, J., & Lu, J. (2018). Numerical simulation of the effect | | | | | | | |
| of wind speed on VOCs diffusion concentration distribution in liquid cargo port area. | | | | | | | |
| Paper presented at the IOP Conference Series: Earth and Environmental Science. | | | | | | | |

### SI-T6 Figure A. Peak Concentrations after Instantaneous Emission, by Wu et al. (2018)

(with written permission)

## SI-T7 Detailed Model Description of Continuous Flow Model for Open-Air Gatherings

The situation considered is described in SI-T5. Scenarios cover different distances from the emitting persons.

Exposure volume is determined by duration and volume of inhale and the concentration at distance to the emitting Standard Persons. The exhale/inhale duration and volume of the COVID-19 persons equals that of the exposed person. We hence can base the calculations on the concentration of virions.

The decrease of concentration of virions follows two cones: caused by wind, and up to 75 centimeters also caused by the kinetics and moisture-temperature based dilution of the exhale. The model further assumes that a person at 75 centimeters from the contaminated person will inhale only exhaled contaminated air, homogenously diluted.

The model is in Gnuplot Version 5.2.1.

**Definitions**

Phi: half angle of breath dilution cone of 40 degrees: 20 degrees equals pi/9 radians; active up to 75 cm from the mouth.

Psi: half angle of cone of dilution by wind of 10 degrees: 5 degrees equals pi/36 radians.

r_75: radius of cone base circle at 75 centimeters from mouth.

A_75: area of cone base circle at 75 centimeters from mouth.

base: concentration of 100 virions over the area of the cone base circle, at 75 centimeters from mouth.

x: distance from exhaler in cm

r(x): radius of the cone base circle at distance x from mouth, x>75.

A(x): area of the cone base circle at distance x from mouth, x>75.

C(x): concentration of virions per square centimeter at distance x from mouth, x>75.

Exposure (x,t): exposure to concentration at point x during t minutes

In gnuplot code:

phi = pi/9;

psi = pi/36;

**Equations**

***Concentrations***

r_75 = 75*(tan(phi)+tan(psi))

A_75 = pi*r_75**2;

base = 100/A_75;

r(x) = (x-75)*tan(psi)+r_75;

A(x) = pi*(r(x)**2);

C(x) = base*A_75/A(x);

***Exposures***

*From exhaler 2*

Exposure (x,t) = t*(60/3.6)*C(x);

*From exhaler 1*

Exposure (x,t) = t*(60/3.6)*C(x+100);

Their sum is the total exposure for different distances and 4 hours in Table 2, and different distances and times in Figure 4. Starting distance is 75cm from exhaler 2 and 175cm from exhaler 1, the exhalers 100cm apart.

End

## SI-T8 Forty Potential Exposure Situations Evaluated

1. **Long Term care dining room**

Safe situation only with high ventilation rate (>20) and low number of emitting persons per m3. Mostly highly infectious.

1. **Patient ward, sleeping room**

Long staying periods many ill may well lead to extreme infection, even with high ventilation rates. Never safe.

1. **Patient ward visitor morning**

Visiting patients in the morning for two hours may often lead to infectious dose, lower chance with high ventilation rate and not many infectious persons.

1. **Bedroom, private**

With low ventilation rates, quite common, and small rooms, highly infectious.

1. **Dining room, guests**

High ventilation rate (20) required for safe dinners with a few infectious persons.

1. **Dining room, small family**

One ill, very low chance of spreading infection, except for VR1 and lower.

1. **Sitting room**

With one ill hardly chance on infection, except for VR1 and lower.

1. **Kitchen Private sitting**

Small space with one ill leads to infectious situation even with VR5.

1. **Kitchen Restaurant walking**

Larger space with one ill poses hardly risks as ventilation usually will be higher than VR5 (norms mostly over >10).

1. **Restaurant inside full**

With 1m2 per person and 2 ill in a ~30m2 (100m3)room the ventilation must be high (>5) to prevent infections.

1. **Bar, well filled**

Also 1m2 per person. Homogeneous related groups may sometimes lead to a high share of infected persons. With 5 ill persons only VR20 prevents infectious exposures for a two hours stay, with longer stays always dangerous.

1. **Shopping mall**

The high air volume per average infected person, infection rate usually well below 4% makes risks minimal, even with exceptional low VR2.

1. **Supermarket**

The supermarket is like the shopping mall, but the residence time tends to be much lower.

1. **Small shop**

With lower numbers on a smaller spot the share of infected may be higher. But chance on infection remains extremely low, even with modest ventilation rates.

1. **Health club, groups**

Rules for ventilation will start at VR10. With 8% infected, 2 persons per 250m2 do not pose any risk.

1. **Shower room/ toilet**

The short residence time and high ventilation rates usual, and mostly required, makes this situation to a near zero-infection risk.

1. **Dressing room (sport, etc.)**

The usually short residence time in the ventilated facilities makes infection highly improbable.

1. **Coffee room (choir, clubs)**

The chance of a higher number of infected persons rises with people knowing each other well. The often longer staying periods increases exposures further. Lower VRs then result in an extreme risk of infection.

1. **Meeting room**

With a low ratio of infected persons (2.5%) and good ventilation there is hardly a risk on infectious exposure. Only VRs around five and lower pose a risk.

1. **Office room**

With a low ratio of infected persons (2.5%) and good ventilation there is hardly a risk on infectious exposure, even for a day-long stay. For the opposite there is always a serious risk of infection.

1. **Non-office workspace**

Larger person density and full working days, and with groups infected (50%) serious infection risks result.

1. **Church (high building)**

Old-fashioned church buildings tend to be very high, with a high dilution. With 2% infected a moderate ventilation rate of 5 is enough to reach a non-infectious situation. Only a very long stay (4 hours) and a ventilation rate of only 1 will some serious exposure result.

1. **Person car ventilation low - medium**

Ventilation rates are high even ventilation is set on low. However, space (in m3) is small. With a short trip of 15 minutes there is no risk yet, but with 2 hours the exposure rises to moderately dangerous.

The medium ventilation position will give a VR60, enough to reduce concentrations and exposures to safe levels even on longer trips.

1. **Train compartment**

With two ill persons in a 6-seats compartment an 8-hour trip will give a very high exposure, even at VR20. Only short trips are well below the 350 virions threshold. So are long trips with a ventilation rate of 40, or a limited presence of one ill person for not more than a few hours.

1. **Bus long distance**

With three ill persons, a 12-hour trip gives always a too high exposure, even with VR20. Only reduced to 4 hours VR20 is below 350.

1. **Bus, metro commuting, busy**

With 2 exhaling persons, short trips are below 350, as are 2-hour trips with 5 ill, but only at VR20.

1. **Airplane cabin (post-corona)**

IATA advice is minimum VR17, also at standing. With 1 exhaler per row of 10 (10%), VR20 suffices for a 2-hours trip. Eight-hour trips may always lead to substantial exposure.

1. **Passenger ship sleeper, next cabin**

They may have through ventilation with 50% fresh air to a next cabin. With four ill in a group of 6, the next cabin will always have an over 350 virions exposure, even at VR20

1. **Exhales normal direct face-to-face**

Single exhales don’t even reach 1 virion per inhale at 100cm, following exhale literature. Inhaling 100 times stays well below 350 but would better be analyzed based on the room ventilation model.

1. **Exhale cough-sneeze inhaled fully**

Though visually intense, the result of receiving the full cough-sneeze directly in the face is quite harmless even at only 100cm distance: the burst leads to fast dilution.

1. **Droplet cough/sneeze hit in** **nose, to alveoli**

Receiving one larger droplet in the nose, an extreme event, would still require the few virions arriving there to next create the way to the alveoli for COVID-19 pneumonia. A highly improbable situation, set at ‘3’, to give a number

1. **Fomite into nose, to alveoli**

Though some partial data are available common view now is that infection is hardly possible, supported by mainly assumption-based quantifications, set a ‘1’.

1. **Stool (fomite) to mouth**

Numbers of virions in stool are high but intake routes in volume seem quite improbable. Assuming them viable, then following the necessary steps as with fomites, leads to a very low chance on alveolar infection.

1. **Food to mouth**

Uncertain but unlikely route, even more unlikely through the hands on the food route.

1. **Terrace outside "room model"**

With a terrace open at three sides and the top it is an extremely well-ventilated room. With very low wind at 1m/s, fresh air comes in every 10 seconds, a ventilation rate of 360. When assuming only VR60, while staying for two hours with 5% ill persons, one may inhale 16 virions.

1. **Terrace outside "exhales & wind model"**

Infection seems highly improbable, as the model gives an upper estimate.

1. **Platform railway/bus station exhales**

With normal staying times exposure for infection seems extremely unlikely.

1. **Mink farms**

Workers have a substantial risk of infection, next spreading in the community. Possibly, infection in close vicinity of mink farms.

1. **Pets, ferrets in sleeping room**

Ferrets are used as animal model due to the similarity in SARS-2 illness, including pneumonia. At 1.5kg we take them as 0.02 person. Sleeping rooms may have a ventilation rate of 1 and often lower to 0.1. Then an exposure with well over 350 virions may come in one night’s sleep. Ferrets as pets may sleep in bed with persons, at less than 50cm breathing distance.

## SI-T9 Direct and Indirect Fluid and Solid Exposures

**This is the extended version of the text in Section 4.7.**

### Closed spaces fluid droplet concentrations & exposures (distance & frequency)

Droplets can be exhaled normally by breathing, speaking, and singing, and in bursts as by coughing and sneezing. Smaller droplets (<5-10µm) evaporate and remain airborne for inhalation, see above. Basics are by (Duguid, 1946). Before evaporation, kinetics rule while gravity takes over for the larger droplets.

On the way down, droplets may hit persons directly, see (Stadnytskyi, Bax, Bax, & Anfinrud, 2020); (Wang et al., 2020); (P. Z. Chen et al., 2020); and see (Niazi et al., 2020), with (X. Chen et al., 2020) discussing the option of infection of the eyes. Droplets may hit objects, then with fomite-based indirect exposure.

Bursts of sneeze and cough have been analyzed by (Bourouiba, 2020; Bourouiba et al., 2014; Redrow, Mao, Celik, Posada, & Feng, 2011; Scharfman et al., 2016), but never linked to viral loads. See for conceptual issues on ‘droplets’ the definitions and assumptions in SI-T1.

**Direct exposure**

There are five element to model and specify on the way to direct exposure and alveolar infection.

1) The number of viable virions per droplet size and size distribution.

These numbers have not been established, only totals, and those quite rudimentary only. A survey on concentrations in exhale fluids and size distribution of droplets is in (Anand & Mayya, 2020), and similar but there not SARS-2 specific in (Buonanno, Stabile, & Morawska, 2020). Using the median concentrations from the survey list of Anand et al. Table 1, we take the five high peak concentrations with a mean of 86*106 copies per mL, PCR-based, leaving out one extreme outlier. The mean median peak is a factor 3 lower, with extreme variations. The 10µm droplet, the standard droplet diameter cough-sneeze-song based, results in a viral load of 0.045 virions per such droplet. Cough-sneeze droplets may also be larger. In a 50µm droplet there are 5.65 virions, in 100µm droplet, falling fast, there are 45 virions. See SI-W17 for details. Song-speak droplets are set at 50µm,

2) Frequency of the droplet-laden exhales.

That number is taken as 100 exhales, 6 minutes. Coughs and sneezes short distance directly in the face are highly unusual, taken as a one-time event. Droplets evaporating before falling are treated in airborne exposure. Alveolar SARS-2 production is not influenced by breathing, singing, or coughing. However, forced exhales may emit mucal droplets that otherwise would have been swallowed, thus adding to total emissions.

3) Spatial spreading of droplets before touching the ground.

Published camera pictures indicate a relevant floor area of 0.5m2, with around 25 visible falling droplets in a cough-sneeze burst, estimated from Figure 1 in (Bourouiba, 2020). In normal breathing and singing they may be smaller and fewer.

4) Nose position of a receiving person.

That position determines the chance of in-nose exposure. The lack of research data is filled with some extreme scenarios of this situation. Key is that the opening of the nose must be in the direction of the falling droplet. The receiving person must be nose-opening up to the exhaler. This is not a normal situation. Next, the surface of the nose opening is around 2.5cm2 of the 5000cm2 of drop-falling area, a chance of 1:2000 of receiving one.

Twenty-five droplets of 50µm (not 10µm) per exhale result in 2500 droplets, a chance of 1.25 per six minutes lying nose up under a singing person. The virion intake then would be seven. A full hit with a large droplet of 100µm would deliver 45 virions to the nose. These outcomes certainly are unrealistically high estimates.

5) From nose to alveoli.

When hitting the nose opening, transport from nose opening to the alveoli must follow, for SARS-2 pneumonia. Direct entry to the alveoli is impossible for larger droplets. There is however an area in the nose with ACE2 receptor cells, supporting the olfactory nerves in the upper nasal cavity. Part of the seven SARS-2 virions of a large direct hit might arrive and replicate there, and similar the 45 virions from a cough-sneeze. They then could produce airborne virions there, inhaled to the alveoli. There exists no modelling, and certainly no data, on this route to COVID-19 pneumonia. The infection of the nose may be by airborne virions, not fluid, a different route.

Overall, the low chance on a full hit into the nose, the low number of virions involved in a full hit into the nose, and the lacking route to the alveoli make this a highly improbable route for infection, set at ‘1’ to give it a number.

**Exposure through fomites**

The fomite route has the same droplets at its starting point. A droplet may hit an object, spreading on it and decaying there. Next the virions are taken up by hand and placed in the nose. The step-by-step model in (Li, Xu, Cai, Hu, & He, 2021), Table 1 and 2, is not linked to sources and lacks empirical data. Real-life measurements may show positive PCR tests on fomites. But viable virions could not be produced in Italian hospital settings (Mondelli, Colaneri, Seminari, Baldanti, & Bruno, 2020) and similarly (Kanamori, 2021), who also could not find any demonstrated fomite infection in the literature. Even the mobile phones of hospitalized COVID-19 patients were mostly virion-free, 20 out of 22 (Ma et al., 2020). (M. Guo, Tao, Flavell, & Zhu, 2021) conclude that information showing relevant concentrations of viable SARS-2 virions on fomites is fully lacking (p.321). The recently changed position paper on this subject by (CDC.Gov, 2021) states that the fomite route can hardly play a role in SARS-2 infections.

A rough quantification: a substantially wet 100µm (0.1mm) droplet, containing 45 virions (high peak, median peak 1.7 virions) may get onto a finger by 10%, a high estimate, while effectively reaching the nose with 10% effectiveness again. That is 0.5 (0.02) virions brought to the nose, still requiring transport to ACE2 cells, replication, and transport to the alveoli for causing COVID-19 pneumonia. We give again a score of ‘*1*’.

This route has serious modelling shortcomings and has mostly missing and some highly variable only indirect data. The numbers constitute a first very rough but extreme worst-case approximation. They seem to indicate zero risk.

### Closed spaces solids to nose: stool and fomites (transport & frequency)

Solids to nose may be from stool directly (Lamers et al., 2020) and indirectly through fomites (Li et al., 2021), both well established as potentially relevant, with partially overlapping environmental routes. The conceptual model for direct stool exposure starts with 1) the virion concentration in stool emitted, 2) amount of stool to hands, 3) from hands to nose, next multiplied by frequency, and (4) from nose to alveoli. The fomite route inserts an additional step, to the object and then from fomite to hand. A survey of the literature and remaining questions on the orofecal route is in (M. Guo et al., 2021) and extensively, covering 59 studies, in (Heneghan, Spencer, Brassey, & Jefferson, 2020). They see limited evidence for viable virions in stool, as opposed to virion-parts measured by PCR, see in this sense also (Wang et al., 2020) and (Xiao et al., 2020). Modelled stool concentrations are in (Miura, Kitajima, & Omori, 2021), Figure 1. They vary widely, between 102 and 107 per gram (= ~mL), decreasing with time after symptom onset. Their data result from PCR measurements, not measures of viable virions in stool. For a worst-case stool concentration, we use their near highest score of one million copies per ml, assumed all viable. Next, how much stool could remain on a fingertip? Larger amounts of somebody’s stool on one’s hands will be cleaned directly. A hand surface of 100mm2 thick 0.02mm (20µ), well visible by color, smelly, and with tangible parts, could be a rough first estimate. That layer of 2mm3 contains 200 virions, decaying with unknown speed. The next step is smearing part of that layer into the entry of the nose. Passing 10% seems a very high estimate, 20 virions. As the finger-virions are not airborne, they first move into the mucal defense layer and some fall victim to the non-specific immunological defenses, see (Fokkens & Scheeren, 2000). There are ACE2 receptor cells in the nose supporting the olfactory bulb, in the upper nasal cavity (Bilinska, Jakubowska, Von Bartheld, & Butowt, 2020), where some virions might arrive. There are suggestions that these cells form a first stage of immunological defense development (Boscolo-Rizzo et al., 2020; Spinato et al., 2020; Yan, Faraji, Prajapati, Boone, & DeConde, 2020; Yan, Faraji, Prajapati, Ostrander, & DeConde, 2020), with infection there possibly indicating a milder course of SARS-2 illness. The final step, from nose infection to alveolar infection would again require transport of airborne virions. The spreading of infection by consecutive adjoining cells in the upper and lower airways (Cevik, Kuppalli, Kindrachuk, & Peiris, 2020; Mason, 2020) seems dubious, lacking ACE2 cells. It fits however with how the influenza virus may spread. There is no real information on this to-be-modelled step. We set a high estimate at ‘*5*’. Adding an in-between fomite step, from stool-to-*object*-to-hand, would reduce the number of stool virions-to-nose substantially, say to 0.1, leading to ‘*0*' exposure of the nose, many orders of magnitude below ill ventilated spaces.

### Closed spaces solids to mouth: stool, fomites, and food (transport & frequency)

Virions to mouth are swallowed, with possibly small intestine infections (30m2 ACE2 cells) and virions production there. A substantial share of the population is in contact with stool from babies and from persons in care situations, while hands rub the mouth very frequently. Next, the route from mouth to intestine must pass the esophagus and stomach, which is possible for many viruses and bacteria. Some break-down may take place. The first step is stool to hands, possibly through fomites, the same as with stool solids to nose regarding the stocks and flows involved. However, while only fingertips can transport into the nose, broader surfaces of the hand can reach the mouth, set at 10cm2, with 2000 virions if indeed viable. Direct mouth contact with contaminated solids may be possible as well, as also in or on foods. This in-between step might very incidentally be substantial, in non-cooked foods, with other illnesses coming up as well. Replication in the small intestines is highly probable given the well-established near certain co-infection with alveolar infection. However, this connection might also be through the circulatory system, potentially bi-directionally. Would there be cases where the intestine infection precedes the alveolar infection? The number of virions swallowed, 10% from hand, can be in the order of 200, see SI-W18, and may be repeated several times. This supposes viable virions reaching the mouth, not established empirically, and next to the small intestines, neither established empirically.

**References**

Anand, S., & Mayya, Y. S. (2020). Size distribution of virus laden droplets from expiratory ejecta of infected subjects. *Scientific Reports, 10*(1), 21174. doi:10.1038/s41598-020-78110-x

Bilinska, K., Jakubowska, P., Von Bartheld, C. S., & Butowt, R. (2020). Expression of the SARS-CoV-2 Entry Proteins, ACE2 and TMPRSS2, in Cells of the Olfactory Epithelium: Identification of Cell Types and Trends with Age. *ACS Chemical Neuroscience, 11*(11), 1555-1562. doi:10.1021/acschemneuro.0c00210

Boscolo-Rizzo, P., Borsetto, D., Fabbris, C., Spinato, G., Frezza, D., Menegaldo, A., . . . Hopkins, C. (2020). Evolution of Altered Sense of Smell or Taste in Patients With Mildly Symptomatic COVID-19. *JAMA Otolaryngology–Head & Neck Surgery*. doi:10.1001/jamaoto.2020.1379

Bourouiba, L. (2020). Turbulent Gas Clouds and Respiratory Pathogen Emissions: Potential Implications for Reducing Transmission of COVID-19. *JAMA, 323*(18), 1837-1838. doi:10.1001/jama.2020.4756

Bourouiba, L., Dehandschoewercker, E., & Bush, John W. M. (2014). Violent expiratory events: on coughing and sneezing. *Journal of Fluid Mechanics, 745*, 537-563. doi:10.1017/jfm.2014.88

Buonanno, G., Stabile, L., & Morawska, L. (2020). Estimation of airborne viral emission: quanta emission rate of SARS-CoV-2 for infection risk assessment. *medRxiv*, 2020.2004.2012.20062828. doi:10.1101/2020.04.12.20062828

CDC.Gov. (2021). *Science Brief: SARS-CoV-2 and Surface (Fomite) Transmission for Indoor Community Environments*. n.p.: CDC Retrieved from https://www.cdc.gov/coronavirus/2019-ncov/more/science-and-research/surface-transmission.html

Cevik, M., Kuppalli, K., Kindrachuk, J., & Peiris, M. (2020). Virology, transmission, and pathogenesis of SARS-CoV-2. *BMJ, 371*, m3862. doi:10.1136/bmj.m3862

Chen, P. Z., Bobrovitz, N., Premji, Z., Koopmans, M., Fisman, D. N., & Gu, F. X. (2020). Heterogeneity in transmissibility and shedding SARS-CoV-2 via droplets and aerosols. *medRxiv*, 2020.2010.2013.20212233. doi:10.1101/2020.10.13.20212233

Chen, X., Yu, H., Mei, T., Chen, B., Chen, L., Li, S., . . . Sun, X. (2020). SARS-CoV-2 on the ocular surface: is it truly a novel transmission route? *British Journal of Ophthalmology*, bjophthalmol-2020-316263. doi:10.1136/bjophthalmol-2020-316263

Duguid, J. (1946). The size and the duration of air-carriage of respiratory droplets and droplet-nuclei. *Epidemiology & Infection, 44*(6), 471-479.

Fokkens, W. J., & Scheeren, R. A. (2000). Upper airway defence mechanisms. *Paediatric Respiratory Reviews, 1*(4), 336-341. doi:https://doi.org/10.1053/prrv.2000.0073

Gralton, J., Tovey, E., McLaws, M.-L., & Rawlinson, W. D. (2011). The role of particle size in aerosolised pathogen transmission: A review. *Journal of Infection, 62*(1), 1-13. doi:https://doi.org/10.1016/j.jinf.2010.11.010

Guo, M., Tao, W., Flavell, R. A., & Zhu, S. (2021). Potential intestinal infection and faecal–oral transmission of SARS-CoV-2. *Nature Reviews Gastroenterology & Hepatology*. doi:10.1038/s41575-021-00416-6

Guo, Z.-D., Wang, Z.-Y., Zhang, S.-F., Li, X., Li, L., Li, C., . . . Chi, X.-Y. (2020). Aerosol and surface distribution of severe acute respiratory syndrome coronavirus 2 in hospital wards, Wuhan, China, 2020. *Emerg Infect Dis, 26*(7).

Gupta, J. K., Lin, C. H., & Chen, Q. (2010). Characterizing exhaled airflow from breathing and talking. *Indoor air, 20*(1), 31-39.

Heneghan, C., Spencer, E., Brassey, J., & Jefferson, T. (2020). SARS-CoV-2 and the Role of Orofecal Transmission: Systematic Review. *medRxiv*.

Jones, N. R., Qureshi, Z. U., Temple, R. J., Larwood, J. P., Greenhalgh, T., & Bourouiba, L. (2020). Two metres or one: what is the evidence for physical distancing in covid-19? *BMJ, 370*.

Kanamori, H. (2021). Rethinking environmental contamination and fomite transmission of SARS-CoV-2 in the healthcare. *Journal of Infection, 82*(1), e17-e18.

Lamers, M. M., Beumer, J., van der Vaart, J., Knoops, K., Puschhof, J., Breugem, T. I., . . . Clevers, H. (2020). SARS-CoV-2 productively infects human gut enterocytes. *Science, 369*(6499), 50-54. doi:10.1126/science.abc1669

Lednicky, J. A., Lauzardo, M., Fan, Z. H., Jutla, A., Tilly, T. B., Gangwar, M., . . . Wu, C.-Y. (2020). Viable SARS-CoV-2 in the air of a hospital room with COVID-19 patients. *International Journal of Infectious Diseases, 100*, 476-482. doi:https://doi.org/10.1016/j.ijid.2020.09.025

Lelieveld, J., Helleis, F., Borrmann, S., Cheng, Y., Drewnick, F., Haug, G., . . . Pöschl, U. (2020). Model Calculations of Aerosol Transmission and Infection Risk of COVID-19 in Indoor Environments. *International Journal of Environmental Research and Public Health, 17*(21), 8114.

Li, S., Xu, Y., Cai, J., Hu, D., & He, Q. (2021). Integrated environment-occupant-pathogen information modeling to assess and communicate room-level outbreak risks of infectious diseases. *Building and Environment, 187*, 107394.

Ma, J., Qi, X., Chen, H., Li, X., Zhang, Z., Wang, H., . . . Morawska, L. (2020). Coronavirus Disease 2019 Patients in Earlier Stages Exhaled Millions of Severe Acute Respiratory Syndrome Coronavirus 2 Per Hour. *Clinical Infectious Diseases*. doi:https://doi.org/10.1093/cid/ciaa1283

Mason, R. J. (2020). Pathogenesis of COVID-19 from a cell biology perspective. *European Respiratory Journal, 55*(4), 2000607. doi:10.1183/13993003.00607-2020

Miura, F., Kitajima, M., & Omori, R. (2021). Duration of SARS-CoV-2 viral shedding in faeces as a parameter for wastewater-based epidemiology: Re-analysis of patient data using a shedding dynamics model. *Science of the Total Environment, 769*, 144549. doi:https://doi.org/10.1016/j.scitotenv.2020.144549

Mondelli, M. U., Colaneri, M., Seminari, E. M., Baldanti, F., & Bruno, R. (2020). Low risk of SARS-CoV-2 transmission by fomites in real-life conditions. *The Lancet infectious diseases*.

Niazi, S., Groth, R., Spann, K., & Johnson, G. R. (2020). The role of respiratory droplet physicochemistry in limiting and promoting the airborne transmission of human coronaviruses: A critical review. *Environmental Pollution*, 115767. doi:https://doi.org/10.1016/j.envpol.2020.115767

Olmedo, I., Nielsen, P. V., de Adana, M. R., Grzelecki, P., & Jensen, R. L. (2010). *Study of the Human Breathing Flow Profile in a Room with Three Different Ventilation Strategies.* Paper presented at the ASHRAE IAQ Conference 2010.

Pan, M., Eiguren‐Fernandez, A., Hsieh, H., Afshar‐Mohajer, N., Hering, S., Lednicky, J., . . . Wu, C. Y. (2016). Efficient collection of viable virus aerosol through laminar‐flow, water‐based condensational particle growth. *Journal of applied microbiology, 120*(3), 805-815.

Redrow, J., Mao, S., Celik, I., Posada, J. A., & Feng, Z.-g. (2011). Modeling the evaporation and dispersion of airborne sputum droplets expelled from a human cough. *Building and Environment, 46*(10), 2042-2051.

Scharfman, B. E., Techet, A. H., Bush, J. W. M., & Bourouiba, L. (2016). Visualization of sneeze ejecta: steps of fluid fragmentation leading to respiratory droplets. *Experiments in Fluids, 57*(2), 24. doi:10.1007/s00348-015-2078-4

Spinato, G., Fabbris, C., Polesel, J., Cazzador, D., Borsetto, D., Hopkins, C., & Boscolo-Rizzo, P. (2020). Alterations in Smell or Taste in Mildly Symptomatic Outpatients With SARS-CoV-2 Infection. *JAMA, 323*(20), 2089-2090. doi:10.1001/jama.2020.6771

Stadnytskyi, V., Bax, C. E., Bax, A., & Anfinrud, P. (2020). The airborne lifetime of small speech droplets and their potential importance in SARS-CoV-2 transmission. *Proceedings of the National Academy of Sciences*, 202006874. doi:10.1073/pnas.2006874117

Vuorinen, V., Aarnio, M., Alava, M., Alopaeus, V., Atanasova, N., Auvinen, M., . . . Grande, R. (2020). Modelling aerosol transport and virus exposure with numerical simulations in relation to SARS-CoV-2 transmission by inhalation indoors. *Safety Science*, 104866.

Wang, W., Xu, Y., Gao, R., Lu, R., Han, K., Wu, G., & Tan, W. (2020). Detection of SARS-CoV-2 in Different Types of Clinical Specimens. *JAMA, 323*(18), 1843-1844. doi:10.1001/jama.2020.3786

Wu, W., Zhu, K., Zhen, C., Zhang, J., & Lu, J. (2018). *Numerical simulation of the effect of wind speed on VOCs diffusion concentration distribution in liquid cargo port area.* Paper presented at the IOP Conference Series: Earth and Environmental Science.

Xiao, F., Tang, M., Zheng, X., Liu, Y., Li, X., & Shan, H. (2020). Evidence for gastrointestinal infection of SARS-CoV-2. *Gastroenterology, 158*(6), 1831-1833. e1833.

Xu, C., Nielsen, P. V., Liu, L., Jensen, R. L., & Gong, G. (2017). Human exhalation characterization with the aid of schlieren imaging technique. *Building and Environment, 112*, 190-199.

Yan, C. H., Faraji, F., Prajapati, D. P., Boone, C. E., & DeConde, A. S. (2020). Association of chemosensory dysfunction and Covid-19 in patients presenting with influenza-like symptoms. *International Forum of Allergy & Rhinology, n/a*(n/a). doi:10.1002/alr.22579

Yan, C. H., Faraji, F., Prajapati, D. P., Ostrander, B. T., & DeConde, A. S. (2020). Self-reported olfactory loss associates with outpatient clinical course in Covid-19. *International Forum of Allergy & Rhinology, n/a*(n/a). doi:10.1002/alr.22592
