# Supplementary material for: Physical Analysis of SARS-CoV-2 Routes: from Primary Production and Emissions to Exposures and COVID-19 Infection
Source: Preprints.org preprint supplement (doi:10.20944/preprints202205.0234.v1), 2022-05-17
Supplement: Supplementary file 4 [file SI-Wx Workbook with Worksheets Supporting Information.xlsx]

## Sheet: Survey
Survey of all Worksheets
Hyperlinks open the corresponding worksheet
SI-W1	Spreadsheet Model for SARS-CoV-2 Pneumonia Development
SI-W2	Airplane Person Density and Ventilation
SI-W3	Stock and Concentration Development with HalfLife 15 Minutes
SI-W4	Stock and Concentration Development with HalfLife 30 Minutes
SI-W5	Stock and Concentration Development with HalfLife 60 Minutes
SI-W6	Stock and Concentration Development with HalfLife 120 minutes
SI-W7	Stock and Concentration Development with HalfLife 180 Minutes
SI-W8	Concentrations in Hospital Room of Lednicky Compared to this Paper and Ma
SI-W9	Exposures under HalfLife 15, Dependent on EmissionTime, Duration of Stay and VentilationRate
SI-W10	Exposures under HalfLife 30, Dependent on EmissionTime, Duration of Stay and VentilationRate
SI-W11	Exposures under HalfLife 60, Dependent on EmissionTime, Duration of Stay and VentilationRate
SI-W12	Exposures under HalfLife 120, Dependent on EmissionTime, Duration of Stay and VentilationRate
SI-W13	Exposures under HalfLife 180, Dependent on EmissionTime, Duration of Stay and VentilationRate
SI-W14	Table B. Exposures overer All Times, Durations, HalfLifes, and VRs. with Color Explanation.
SI-W15	Table C. Exposures HalfLife 120 (Standard), All Times, Durations, and VRs
SI-W16	Spreadsheet Model with Stocks (1 Standard Person), Concentrations (Standard Room) and Exemplary Exposures
SI-W17	Virion Content of Droplets and Mass/Volume Relations
SI-W18	Viable Virions in Stool Maximum Estimates
SI-W19	Exhales Exposures With Several Cone Models and a Virtual Room Model
SI-W20	Peak Concentrations for 3 Wind Speeds and 3 Measurement Points at Industrial Site
SI-W21	Exposure Situations Quantified with their Scenarios
SI-W22	Exposure Scenarios as in SI-W21 Ordered as to Potential Exposure
SI-W23	Table 3. Excerpt from SI-W21, Shortened for Page Length

## Sheet: SI-W1
Primary SARS2 virion production, replication, breakdown, and emissions
Alveoli number in human lungs, thousands			480000	480 million	Note 1
Share and number of alveoli infected start period 1			5e-08	24	Note 2
Intact virions per dead cell ensemble first half day			200		Note 3
intact virions produced end period 1 (half day)			4800
Share of virions destructed per 12 h in alveolar and bronchioli zone.			0.95
Virions destructed as by defense mechanisms			4560
Intact virions remaining start period 2			240
Share and number of intact virions to upper airways			0.85	204	Note 4
Share and nr of intact virions remaining in alveoliar zone.			0.15	36
Number of virions infecting new alveoli in period 2			36
Intact virions produced end period 2			7200
Share of virions destructed as by general defenses full day			0.96																Reference
Intact virions remaining start day 1			288																Person
Share and number of intact virions to airways			0.85	244.8															around
Share and nr of intact virions remaining for new alveoli infection			0.15	43.2			ç	up to 10 days time between exposure and measured infection (after Ivorra et al. 2020)									è		Day 17 set at:
Doubling factor per day (rough estimate)		1.8	This number corresponds to doubling time of 28 hours, 1680 minutes, easily varied.																100.000 virions/hr
		On day:	1	2	3	4	5	6	7	8	9	10	11	12	13	14	15	16	17	18	19	20	21	22	23	24	25	26	27	28
Intact virions (re-)infecting alveoli, per day			43.2	77.76	139.968	251.942	453.496	816.293	1469.33	2644.79	4760.62	8569.12	15424.4	27764	49975.1	89955.2	161919	291455	524619	944314	1.69976e+06	3.05958e+06	5.50724e+06	9.91303e+06	1.78435e+07	3.21182e+07	5.78128e+07	1.04063e+08	1.87313e+08	3.37164e+08
Share of alveoli infected during that day			9e-08	1.62e-07	2.916e-07	5.2488e-07	9.44784e-07	1.70061e-06	3.0611e-06	5.50998e-06	9.91796e-06	1.78523e-05	3.21342e-05	5.78416e-05	0.000104115	0.000187407	0.000337332	0.000607198	0.00109296	0.00196732	0.00354118	0.00637412	0.0114734	0.0206521	0.0371739	0.0669129	0.120443	0.216798	0.390236	0.702425
Cumulative share of alveoli infected			9e-08	2.52e-07	5.436e-07	1.06848e-06	2.01326e-06	3.71388e-06	6.77498e-06	1.2285e-05	2.22029e-05	4.00553e-05	7.21895e-05	0.000130031	0.000234146	0.000421553	0.000758885	0.00136608	0.00245904	0.00442636	0.00796754	0.0143417	0.0258151	0.0464672	0.0836411	0.150554	0.270997	0.487795	0.878032	1.58046
Intact virions towards airways, per day			244.8	440.64	793.152	1427.67	2569.81	4625.66	8326.19	14987.1	26976.9	48558.4	87405	157329	283192	509746	917543	1.65158e+06	2.97284e+06	5.35111e+06	9.632e+06	1.73376e+07	3.12077e+07	5.61738e+07	1.01113e+08	1.82003e+08	3.27606e+08	5.8969e+08	1.06144e+09	1.9106e+09
Share leaving airborne	Note 5	0.6																												Note 9
Share caught in mucus		0.4
Number of airborne virions exhaled per day			146.88	264.384	475.891	856.604	1541.89	2775.4	4995.72	8992.29	16186.1	29135	52443	94397.4	169915	305848	550526	990947	1.7837e+06	3.21067e+06	5.7792e+06	1.04026e+07	1.87246e+07	3.37043e+07	6.06677e+07	1.09202e+08	1.96563e+08	3.53814e+08	6.36866e+08	1.14636e+09
Number of airborne virions exhaled per hour			6.12	11.016	19.8288	35.6918	64.2453	115.642	208.155	374.679	674.422	1213.96	2185.13	3933.23	7079.81	12743.7	22938.6	41289.4	74321	133778	240800	433440	780192	1.40435e+06	2.52782e+06	4.55008e+06	8.19014e+06	1.47423e+07	2.65361e+07	4.77649e+07
According to measurements by Ma et al (2020)	between:														6000				60				600000
	Between 6000 t0 600000 virions per hour, different between persons, day of ilness and different per person over time. Log midvalue used as indication: 60 000. At 600 000 the patient will be ill in hospital.
Number of virions per exhalation			0.00612	0.011016	0.0198288	0.0356918	0.0642453	0.115642	0.208155	0.374679	0.674422	1.21396	2.18513	3.93323	7.07981	12.7437	22.9386	41.2894	74.321	133.778	240.8	433.44	780.192	1404.35	2527.82	4550.08	8190.14	14742.3	26536.1	47764.9
Number of virions caught in mucus per day			97.92	176.256	317.261	571.069	1027.92	1850.26	3330.48	5994.86	10790.7	19423.3	34962	62931.6	113277	203898	367017	660631	1.18914e+06	2.14044e+06	3.8528e+06	6.93504e+06	1.24831e+07	2.24695e+07	4.04452e+07	7.28013e+07	1.31042e+08	2.35876e+08	4.24577e+08	7.64239e+08
Share and number in mucus swallowed	Note 6	0.99	96.9408	174.493	314.088	565.359	1017.65	1831.76	3297.17	5934.91	10682.8	19229.1	34612.4	62302.3	112144	201859	363347	654025	1.17724e+06	2.11904e+06	3.81427e+06	6.86569e+06	1.23582e+07	2.22448e+07	4.00407e+07	7.20733e+07	1.29732e+08	2.33517e+08	4.20331e+08	7.56596e+08
In mucus NOT swallowed	Note 7	0.01		1.76256	3.17261	5.71069	10.2792	18.5026	33.3048	59.9486	107.907	194.233	349.62	629.316	1132.77	2038.98	3670.17	6606.31	11891.4	21404.4	38528	69350.4	124831	224695	404452	728013	1.31042e+06	2.35876e+06	4.24577e+06	7.64239e+06

## Sheet: SI-W2
Airplane cabin person-density economy class
Wide	10x19 inch + 2x17inch:		5.6448	m
Sitting length 1 row			0.95	m
10 seats/persons			5.36256	m2
Persons per row			10
Persons per m2			1.86478
	Height in m	2	10.7251	m3
Persons per 20m3		20	18.6478
Emitters 1 per row		0.1	1.86478	emitting
Ventilation
IATA advises VR: >17, also before take-off and after landing.
Deviating method of ventilation: not well-mixed but vertically down flow displacement.

## Sheet: SI-W3
HL15	1 Standard Person
t\\VR	0	0.1	0.5	1	2	5	10	20	40	60
1	1609	1607.6	1602.4	1595.8	1582.6	1544.2	1483	1370	1177.4	1021
5	7356.8	7327.4	7211.6	7070	6798.4	6065.2	5071.6	3691.8	2247.2	1567.6
15	17873	17677	16922.6	16043	14472.2	10930.8	7449	4344.8	2322	1582.6
60	33985.8	33015.6	29568.8	26063.4	20929.8	12979	7911.2	4441	2365.6	1612.2
120	36961.8	35710.2	31430.8	27316	21631.4	13309.8	8109.6	4552.4	2425	1652.6
240	38982.2	37636.8	33071.4	28716.8	22731	13985.2	8521.2	4783.4	2548	1736.6
360	40961.4	39547.6	34750	30174.4	23884.6	14695.2	8953.6	5026.2	2677.4	1824.6
480	43040.4	41554.8	36513.8	31706	25097	15441	9408.2	5281.2	2813.2	1917.2
600	45225	43664	38367.2	33315.4	26370.8	16224.8	9885.6	5549.4	2956	2014.6
720	47520.4	45880.2	40314.6	35006.2	27709.2	17048.2	10387.4	5831	3106	2116.8
1320	60868.2	58767.4	51638.4	44839.2	35492.4	21836.8	13305	7468.8	3978.6	2711.4
1440	63957.8	61750.2	54259.4	47115	37294	22945.2	13980.4	7848	4180.4	2849
2880	115856	111857	98288	85346.4	67556	41564	25324.8	14216	7572.6	5160.8
Virions per m3		for 1 emitting person per 20m3, equals 5 persons per 100m3
t\\VR	0	0.1	0.5	1	2	5	10	20	40	60
1	80.45	80.38	80.12	79.79	79.13	77.21	74.15	68.5	58.87	51.05
5	367.84	366.37	360.58	353.5	339.92	303.26	253.58	184.59	112.36	78.38
15	893.65	883.85	846.13	802.15	723.61	546.54	372.45	217.24	116.1	79.13
60	1699.29	1650.78	1478.44	1303.17	1046.49	648.95	395.56	222.05	118.28	80.61
120	1848.09	1785.51	1571.54	1365.8	1081.57	665.49	405.48	227.62	121.25	82.63
240	1949.11	1881.84	1653.57	1435.84	1136.55	699.26	426.06	239.17	127.4	86.83
360	2048.07	1977.38	1737.5	1508.72	1194.23	734.76	447.68	251.31	133.87	91.23
480	2152.02	2077.74	1825.69	1585.3	1254.85	772.05	470.41	264.06	140.66	95.86
600	2261.25	2183.2	1918.36	1665.77	1318.54	811.24	494.28	277.47	147.8	100.73
720	2376.02	2294.01	2015.73	1750.31	1385.46	852.41	519.37	291.55	155.3	105.84
1320	3043.41	2938.37	2581.92	2241.96	1774.62	1091.84	665.25	373.44	198.93	135.57
1440	3197.89	3087.51	2712.97	2355.75	1864.7	1147.26	699.02	392.4	209.02	142.45
2880	5792.8	5592.87	4914.4	4267.32	3377.8	2078.2	1266.24	710.8	378.63	258.04

## Sheet: SI-W4
HL 30	1 Standard Emitting Person
t\\VR	0	0.1	0.5	1	2	5	10	20	40	60
1	1627.6	1626.2	1620.8	1614.2	1600.8	1561.8	1499.6	1385	1189.4	1030.8
5	7781.2	7749.4	7624.4	7471.8	7179	6389.6	5322	3846.2	2314.2	1602
15	20935.8	20691.4	19752.4	18659.8	16716.6	12380.4	8206.8	4619.6	2399.8	1618.2
60	54251.2	52215.8	45140.8	38223.6	28701.2	15766	8872.2	4728.6	2444.8	1648.6
120	69173.6	65336.4	53117.2	42697.2	30391.6	16187.6	9094.8	4847	2506.2	1690
240	77008	71995.8	57034.4	45225.4	31969	17009.4	9556.4	5093	2633.4	1775.8
360	81187	75821.2	59957.4	47524	33591.6	17872.8	10041.4	5351.6	2767	1865.8
480	85324.6	79678.4	63001.4	49936.2	35296.6	18779.8	10551	5623.2	2907.4	1960.6
600	89656.4	83723	66199	52470.8	37088.2	19733	11086.6	5908.6	3055	2060
720	94207.2	87972.6	69559.2	55134	38970.6	20734.6	11649.4	6208.6	3210	2164.6
1320	120669	112683	89097.4	70620.4	49917	26558.8	14921.4	7952.4	4111.6	2772.6
1440	126793	118402	93619.6	74205	52450.6	27906.8	15678.8	8356	4320.4	2913.4
2880	229680	214480	169587	134418	95011.6	50551.6	28401.4	15136.6	7826.2	5277.4
Virions per m3		for 1 emitting person per 20m3, equals 5 persons per 100m3
t\\VR	0	0.1	0.5	1	2	5	10	20	40	60
1	81.38	81.31	81.04	80.71	80.04	78.09	74.98	69.25	59.47	51.54
5	389.06	387.47	381.22	373.59	358.95	319.48	266.1	192.31	115.71	80.1
15	1046.79	1034.57	987.62	932.99	835.83	619.02	410.34	230.98	119.99	80.91
60	2712.56	2610.79	2257.04	1911.18	1435.06	788.3	443.61	236.43	122.24	82.43
120	3458.68	3266.82	2655.86	2134.86	1519.58	809.38	454.74	242.35	125.31	84.5
240	3850.4	3599.79	2851.72	2261.27	1598.45	850.47	477.82	254.65	131.67	88.79
360	4059.35	3791.06	2997.87	2376.2	1679.58	893.64	502.07	267.58	138.35	93.29
480	4266.23	3983.92	3150.07	2496.81	1764.83	938.99	527.55	281.16	145.37	98.03
600	4482.82	4186.15	3309.95	2623.54	1854.41	986.65	554.33	295.43	152.75	103
720	4710.36	4398.63	3477.96	2756.7	1948.53	1036.73	582.47	310.43	160.5	108.23
1320	6033.43	5634.15	4454.87	3531.02	2495.85	1327.94	746.07	397.62	205.58	138.63
1440	6339.67	5920.12	4680.98	3710.25	2622.53	1395.34	783.94	417.8	216.02	145.67
2880	11484	10724	8479.35	6720.92	4750.58	2527.58	1420.07	756.83	391.31	263.87

## Sheet: SI-W5
HalfLife 60		1 Standard Emitting Person
t\\VR	0	0.1	0.5	1	2	5	10	20	40	60
1	1637	1635.6	1630.2	1623.4	1610	1570.8	1508	1392.6	1195.6	1035.8
5	8005.8	7972.8	7842.8	7684.4	7380.2	6560.8	5454	3927.2	2349	1619.6
15	22743.2	22469.6	21419.2	20198.2	18030.8	13219	8636.4	4769.8	2440.6	1636.8
60	72237	69150.8	58535.2	48358.8	34791.4	17648	9446	4886.8	2486.4	1667.4
120	110166	102169	77754	58466	38017.6	18149.8	9683	5009.2	2548.8	1709.2
240	143299	128267	88851.6	63411.6	40121.4	19071.4	10174.4	5263.4	2678.2	1796
360	157458	139058	94019	66697	42158.6	20039.4	10690.8	5530.6	2814	1887.2
480	167172	146992	98851.6	70084.6	44298.4	21056.4	11233.4	5811.4	2956.8	1983
600	176087	154632	103875	73642	46546.8	22125.2	11803.6	6106.4	3107	2083.6
720	185132	162518	109147	77379.8	48909.4	23248.2	12402.8	6416.2	3264.6	2189.4
1320	237176	208178	139806	99114.8	62647.4	29778.4	15886.4	8218.4	4181.6	2804.2
1440	249215	218745	146902	104145	65827.2	31289.8	16692.8	8635.6	4394	2946.6
2880	451439	396244	266104	188654	119242	56679.8	30238.2	15643	7959.4	5337.6
Virions per m3		for 1 emitting person per 20m3, equals 5 persons per 100m3
t\\VR	0	0.1	0.5	1	2	5	10	20	40	60
1	81.85	81.78	81.51	81.17	80.5	78.54	75.4	69.63	59.78	51.79
5	400.29	398.64	392.14	384.22	369.01	328.04	272.7	196.36	117.45	80.98
15	1137.16	1123.48	1070.96	1009.91	901.54	660.95	431.82	238.49	122.03	81.84
60	3611.85	3457.54	2926.76	2417.94	1739.57	882.4	472.3	244.34	124.32	83.37
120	5508.31	5108.46	3887.7	2923.3	1900.88	907.49	484.15	250.46	127.44	85.46
240	7164.97	6413.36	4442.58	3170.58	2006.07	953.57	508.72	263.17	133.91	89.8
360	7872.91	6952.9	4700.95	3334.85	2107.93	1001.97	534.54	276.53	140.7	94.36
480	8358.58	7349.61	4942.58	3504.23	2214.92	1052.82	561.67	290.57	147.84	99.15
600	8804.35	7731.62	5193.73	3682.1	2327.34	1106.26	590.18	305.32	155.35	104.18
720	9256.61	8125.89	5457.37	3868.99	2445.47	1162.41	620.14	320.81	163.23	109.47
1320	11858.8	10408.9	6990.28	4955.74	3132.37	1488.92	794.32	410.92	209.08	140.21
1440	12460.7	10937.2	7345.08	5207.27	3291.36	1564.49	834.64	431.78	219.7	147.33
2880	22572	19812.2	13305.2	9432.7	5962.12	2833.99	1511.91	782.15	397.97	266.88

## Sheet: SI-W6
HL120		1 Standard Emitting Person
t\\VR	0	0.1	0.5	1	2	5	10	20	40	60
1	1641.8	1640.4	1635	1628.2	1614.6	1575.2	1512.4	1396.4	1198.6	1038.2
5	8121.4	8087.8	7955.2	7793.8	7483.8	6649	5521.8	3968.6	2366.8	1628.6
15	23726.8	23437.2	22325.4	21034	18743.4	13671	8865.4	4848.4	2461.6	1646.2
60	84571.4	80729	67578.8	55093	38708.8	18761.2	9761.4	4969.8	2507.8	1677
120	146492	134404	98255.8	70805	43383.2	19320.8	10006.4	5094.4	2570.6	1719
240	227174	196246	121316	79190.2	45982.6	20301.8	10514.4	5353	2701.2	1806.2
360	275327	228731	130798	83533.8	48320	21332.4	11048	5624.8	2838.2	1898
480	307613	249560	138049	87795.6	50772.6	22415	11608.8	5910.2	2982.2	1994.4
600	332383	266002	145168	92253.2	53349.8	23552.8	12198	6210.2	3133.6	2095.6
720	353831	281048	152557	96935.8	56057.6	24748.2	12817.2	6525.4	3292.8	2201.8
1320	458411	361243	195414	124164	71803.4	31699.6	16417.4	8358.2	4217.6	2820.4
1440	481750	379586	205332	130466	75448	33308.6	17250.6	8782.6	4431.6	2963.6
2880	872782	687608	371948	236332	136670	60336.8	31248.6	15909	8027.8	5368.2
Virions per m3		for 1 emitting person per 20m3, equals 5 persons per 100m3
t\\VR	0	0.1	0.5	1	2	5	10	20	40	60
1	82.09	82.02	81.75	81.41	80.73	78.76	75.62	69.82	59.93	51.91
5	406.07	404.39	397.76	389.69	374.19	332.45	276.09	198.43	118.34	81.43
15	1186.34	1171.86	1116.27	1051.7	937.17	683.55	443.27	242.42	123.08	82.31
60	4228.57	4036.45	3378.94	2754.65	1935.44	938.06	488.07	248.49	125.39	83.85
120	7324.61	6720.2	4912.79	3540.25	2169.16	966.04	500.32	254.72	128.53	85.95
240	11358.7	9812.31	6065.81	3959.51	2299.13	1015.09	525.72	267.65	135.06	90.31
360	13766.4	11436.5	6539.91	4176.69	2416	1066.62	552.4	281.24	141.91	94.9
480	15380.7	12478	6902.43	4389.78	2538.63	1120.75	580.44	295.51	149.11	99.72
600	16619.1	13300.1	7258.39	4612.66	2667.49	1177.64	609.9	310.51	156.68	104.78
720	17691.6	14052.4	7627.84	4846.79	2802.88	1237.41	640.86	326.27	164.64	110.09
1320	22920.5	18062.1	9770.68	6208.19	3590.17	1584.98	820.87	417.91	210.88	141.02
1440	24087.5	18979.3	10266.6	6523.3	3772.4	1665.43	862.53	439.13	221.58	148.18
2880	43639.1	34380.4	18597.4	11816.6	6833.5	3016.84	1562.43	795.45	401.39	268.41

## Sheet: SI-W7
HL180		1 Standard Emittting Person
t\\VR	0	0.1	0.5	1	2	5	10	20	40	60
1	1643.2	1642	1636.4	1629.6	1616.2	1576.8	1513.8	1397.6	1199.6	1039.2
5	8160.4	8126.6	7993.2	7830.8	7518.8	6678.6	5544.8	3982.6	2372.8	1631.6
15	24067.4	23772.2	22639	21323	18989.8	13826.8	8944	4875.2	2468.6	1649.4
60	89330.6	85190.4	71044.8	57655.6	40178	19162.6	9871.4	4998.2	2515	1680.2
120	162471	148507	107027	75935.4	45500.8	19745.4	10119.2	5123.4	2578	1722.4
240	273069	232640	137262	86263.4	48335.2	20748.2	10632.8	5383.6	2708.8	1809.8
360	351405	283953	149977	91193.8	50794.6	21801.2	11172.4	5656.8	2846.4	1901.6
480	409860	318741	158922	95869.6	53372.8	22907.8	11739.6	5944	2990.8	1998.2
600	456250	345428	167297	100740	56081.8	24070.4	12335.4	6245.6	3142.6	2099.6
720	495527	368381	175860	105853	58928.4	25292.2	12961.6	6562.6	3302.2	2206.2
1320	663230	478357	225282	135586	75480.6	32396.4	16602.2	8406	4229.6	2825.8
1440	697901	502739	236717	142468	79311.8	34040.8	17445	8832.6	4444.4	2969.2
2880	1.26694e+06	910864	428801	258073	143669	61663.2	31600.6	15999.8	8050.8	5378.6
Virions per m3		for 1 emitting person per 20m3, equals 5 persons per 100m3
t\\VR	0	0.1	0.5	1	2	5	10	20	40	60
1	82.16	82.1	81.82	81.48	80.81	78.84	75.69	69.88	59.98	51.96
5	408.02	406.33	399.66	391.54	375.94	333.93	277.24	199.13	118.64	81.58
15	1203.37	1188.61	1131.95	1066.15	949.49	691.34	447.2	243.76	123.43	82.47
60	4466.53	4259.52	3552.24	2882.78	2008.9	958.13	493.57	249.91	125.75	84.01
120	8123.57	7425.34	5351.33	3796.77	2275.04	987.27	505.96	256.17	128.9	86.12
240	13653.4	11632	6863.11	4313.17	2416.76	1037.41	531.64	269.18	135.44	90.49
360	17570.3	14197.6	7498.87	4559.69	2539.73	1090.06	558.62	282.84	142.32	95.08
480	20493	15937	7946.09	4793.48	2668.64	1145.39	586.98	297.2	149.54	99.91
600	22812.5	17271.4	8364.85	5036.98	2804.09	1203.52	616.77	312.28	157.13	104.98
720	24776.4	18419.1	8792.99	5292.66	2946.42	1264.61	648.08	328.13	165.11	110.31
1320	33161.5	23917.9	11264.1	6779.3	3774.03	1619.82	830.11	420.3	211.48	141.29
1440	34895	25137	11835.9	7123.39	3965.59	1702.04	872.25	441.63	222.22	148.46
2880	63346.8	45543.2	21440	12903.6	7183.45	3083.16	1580.03	799.99	402.54	268.93

## Sheet: SI-W8
Comparison with measurements by Lednicky et al 2020, Table 2.
Concentration measurement and mass balance-based modelling: a comparison
Situation Lednicky et al:
2 SARS-2 patients in 30m2 (= ~100m3) room, VR6, presence time up to 24 hours
Lednicky et al., (2020)				100	m3
Measurement after ~24 hours			nr 1	94000	virions/m3
			nr 2	30000	virions/m3
			nr 3	44000	virions/m3
			nr 4	16000	virions/m3
			mean	56000	virions/m3
Huppes & Huele (this paper) results for 5 persons per 100m3, standard person 100,000 virions per hour
	after 24 hours HL120, VR5			166543	virions stock in 100m3 room			See SI-W6
	Reduced from 5 to 2 persons			66617.2	virions stock in 100m3 room
	virions per cubic meter			666.172	virions/m3
Following Ma et al. (2020), highest score 10,000,000 virions per hour,
our concentration score would rise to				66617	virions/m3	in line with Lednicky et al.
Quantification methods of Lednicky et al. and Ma et al. (upper score) give unrealistically high results.
Their numbers would give highly infectious concentrations in almost any situation, or the infectious dose would have to be orders of magnitude higher.
Lednicky et al. warn that quantification methods contain many unclear steps, with relative scores in time most reliable.
Ma et al. also give lower scores, up to 3 orders of magnitude lower, then well in line with our modeling numbers. But they are PCR-measurement based.
Lednicky, J. A., Lauzardo, M., Fan, Z. H., Jutla, A., Tilly, T. B., Gangwar, M., . . . Wu, C.-Y. (2020).
	Viable SARS-CoV-2 in the air of a hospital room with COVID-19 patients.
	International Journal of Infectious Diseases, 100, 476-482.
	doi:https://doi.org/10.1016/j.ijid.2020.09.025
Ma, J., Qi, X., Chen, H., Li, X., Zhang, Z., Wang, H., . . . Morawska, L. (2020).
	Coronavirus Disease 2019 Patients in Earlier Stages Exhaled Millions of Severe
	Acute Respiratory Syndrome Coronavirus 2 Per Hour.
	Clinical Infectious Diseases. https://doi.org/10.1093/cid/ciaa1283

## Sheet: SI-W9
t\\VR	0	0.1	0.5	1	2	5	10	20	40	60
[0,1]	0	0	0	0	0	0	0	0	0	0
[0,5]	8	8	8	8	8	7	6	5	4	3
[0,15]	62	62	60	58	54	45	34	22	13	9
[0,240]	3393	3287	2920	2562	2056	1291	796	451	241	165
[60,1]	14	14	12	11	9	5	3	2	1	1
[60,5]	71	69	62	55	44	27	16	9	5	3
[60,15]	217	210	188	165	132	81	50	28	15	10
[60,240]	3785	3656	3219	2799	2218	1365	832	467	249	169
[240,1]	16	16	14	12	9	6	4	2	1	1
[240,5]	81	78	69	60	47	29	18	10	5	4
[240,15]	244	236	207	180	143	88	53	30	16	11
[240,240]	4098	3956	3476	3019	2389	1470	896	503	268	183
[480,1]	18	17	15	13	10	6	4	2	1	1
[480,5]	90	87	76	66	52	32	20	11	6	4
[480,15]	270	261	229	199	157	97	59	33	18	12
[480,240]	4524	4368	3838	3333	2638	1623	989	555	296	202
[600,1]	19	18	16	14	11	7	4	2	1	1
[600,5]	94	91	80	69	55	34	21	12	6	4
[600,15]	284	274	241	209	165	102	62	35	19	13
[600,240]	4754	4590	4033	3502	2772	1706	1039	583	311	212
[1440,1]	27	26	23	20	16	10	6	3	2	1
[1440,5]	133	129	113	98	78	48	29	16	9	6
[1440,15]	401	387	340	295	234	144	88	49	26	18
[1440,240]	6723	6491	5704	4953	3920	2412	1470	825	439	299

[truncated: 14 more sheets: SI-W10, SI-W11, SI-W12, SI-W13, SI-W14, SI-W15, SI-W16, SI-W17, SI-W18, SI-W19, SI-W20, SI-W21, SI-W22, SI-W23]
