# Supplementary material for: Physical Analysis of SARS-CoV-2 Routes: from Primary Production and Emissions to Exposures and COVID-19 Infection
Source: Preprints.org preprint supplement (doi:10.20944/preprints202205.0234.v1), 2022-05-17
Supplement: Supplementary file 5 [file Table 1. Exposures depending on time of stay of infected persons (t), duration of stay (period) and ventilation rate.xlsx]

## Sheet: HL180vsHL120vsHL60vsHL30vsHL15
[t,period]	VR0.1	VR0.5	VR1	VR2	VR5	VR10	VR20	VR40	VR60
[0,1]	0	0	0	0	0	0	0	0	0
[60,1]	34	28	23	16	8	4	2	1	1
[240,1]	82	51	33	19	8	4	2	1	1
[480,1]	104	58	37	21	9	5	2	1	1
[600,1]	111	60	38	22	10	5	3	1	1
[1320,1]	151	81	52	30	13	7	3	2	1
[2760,1]	273	148	94	54	24	12	6	3	2
[0,5]	8	8	8	8	7	7	5	4	3
[60,5]	174	145	117	81	39	20	10	5	3
[240,5]	411	253	165	96	42	22	11	6	4
[480,5]	521	288	183	106	47	24	12	6	4
[600,5]	555	303	192	111	49	25	13	7	4
[1320,5]	753	408	259	150	66	34	17	9	6
[2760,5]	1365	738	469	271	120	62	32	16	11
[0,15]	75	72	69	64	52	38	24	14	10
[60,15]	554	455	363	249	118	61	31	16	11
[240,15]	1243	763	497	288	127	66	34	17	11
[480,15]	1567	866	550	318	141	73	37	19	13
[600,15]	1669	910	578	334	148	76	39	20	13
[1320,15]	2265	1225	778	450	199	103	52	26	18
[2760,15]	4103	2219	1410	815	360	186	95	48	32
[0,120]	3812	3079	2445	1695	857	465	243	124	83
[60,120]	6577	4784	3460	2146	966	500	255	129	86
[240,120]	10698	6323	4070	2357	1041	539	274	138	93
[480,120]	12899	7080	4500	2603	1149	595	303	153	102
[600,120]	13679	7442	4729	2735	1207	625	318	161	107
[1320,120]	18517	10017	6364	3681	1625	842	428	216	145
[2760,120]	33543	18145	11529	6667	2943	1524	776	392	262
[0,240]	12263	8681	6240	3935	1847	978	504	256	171
[0,960]	91126	52286	34012	19998	8939	4651	2374	1199	802
[0,1440]	159990	89542	57684	33688	14982	7781	3967	2003	1340
[0,2880]	471052	257805	164597	95515	42278	21917	11164	5635	3768
Color explanation
	No infectious exposures ('< 100' virions)
	Low infectious exposures ('100 to 350' virions)
	For 5 minutes stay, infectious dose ('> 350' virions) only with very low VRs
	For 15 minutes stay, infectious dose except for VR10 and higher
	For 120 minutes stay, serious chance on infection except for VR20 and higher
	Long stay, high chance on severe infection, up to > 1000 times infective dose

## Sheet: Sheet1
[t, p)	[0,1]	[60,1]	[240,1]	[480,1]	[600,1]	[1320,1]	[2760,1]	[0,5]	[60,5]	[240,5]	[480,5]	[600,5]	[1320,5]	[2760,5]	[0,15]	[60,15]	[240,15]	[480,15]	[600,15]	[1320,15]	[2760,15]	[0,120]	[60,120]	[240,120]	[480,120]	[600,120]	[1320,120]	[2760,120]	[0,1440]	[0,2880]
VR0	0	35	95	128	139	191	346	8	182	476	642	693	956	1732	75	583	1443	1933	2086	2874	5207	4041	7192	12655	16020	17164	23499	42576	198783	593612
0.1	0	34	82	104	111	151	273	8	174	411	521	555	753	1365	75	554	1243	1567	1669	2265	4103	3812	6577	10698	12899	13679	18517	33543	159990	471052
0.5	0	28	51	58	60	81	148	8	145	253	288	303	408	738	72	455	763	866	910	1225	2219	3079	4784	6323	7080	7442	10017	18145	89542	257805
1	0	23	33	37	38	52	94	8	117	165	183	192	259	469	69	363	497	550	578	778	1410	2445	3460	4070	4500	4729	6364	11529	57684	164597
2	0	16	19	21	22	30	54	8	81	96	106	111	150	271	64	249	288	318	334	450	815	1695	2146	2357	2603	2735	3681	6667	33688	95515
5	0	8	8	9	10	13	24	7	39	42	47	49	66	120	52	118	127	141	148	199	360	857	966	1041	1149	1207	1625	2943	14982	42278
10	0	4	4	5	5	7	12	7	20	22	24	25	34	62	38	61	66	73	76	103	186	465	500	539	595	625	842	1524	7781	21917
20	0	2	2	2	3	3	6	5	10	11	12	13	17	32	24	31	34	37	39	52	95	243	255	274	303	318	428	776	3967	11164
40	0	1	1	1	1	2	3	4	5	6	6	7	9	16	14	16	17	19	20	26	48	124	129	138	153	161	216	392	2003	5635
60	0	1	1	1	1	1	2	3	3	4	4	4	6	11	10	11	11	13	13	18	32	83	86	93	102	107	145	262	1340	3768
