# Supplementary material for: Physical Analysis of SARS-CoV-2 Routes: from Primary Production and Emissions to Exposures and COVID-19 Infection
Source: Preprints.org preprint supplement (doi:10.20944/preprints202205.0234.v1), 2022-05-17
Supplement: Supplementary file 6 [file Table 2. Exposures at different distances on 100m2 terrace two emitting persons in line.xlsx]

## Sheet: Sheet1
Distance from Exhaler 1 in cm	175	200	500	1000	1500
Virions inhaled from Exhaler 1	48.27	44.41	20	8.343	4.55
Virions inhaled from Exhaler 2	70.13	63.45	25.23	9.663	5.066
Total Exposure Person X	118.4	107.9	45.23	18.01	9.616
