# Supplementary material for: Physical Analysis of SARS-CoV-2 Routes: from Primary Production and Emissions to Exposures and COVID-19 Infection
Source: Preprints.org preprint supplement (doi:10.20944/preprints202205.0234.v1), 2022-05-17
Supplement: Supplementary file 7 [file Table 3. Exposures in selected situations and scenarios.xlsx]

## Sheet: Sheet1
Situations:	Exposure scenarios:
	Ill ratio	Maximum density (or distance)	Emitting persons	Start time, period	VRs/ Liter	Exposure to virions	Relative to Ref. 350 virions	Ref. Super-market 15 min.
Bedroom, private, low VR	0.5	2/8m2;h2.5m	1/20m3	t0,960	0.1	91126	260	11506
Patient ward, sleeping, low VR	0.5	10/30m2;h3.3m	5/100m3	t0,960	0.1	91126	260	11506
Train compartment long distance	0.33	6/8m2;h2.5m	2/20m3	t0,960	2	39996	114	5050
Bus long distance	0.05	60/80m2h;2.5m	3/100m3	t0,960	2	11999	34	1515
Office room	0.25	5/30m2;h3.3m	2.5/100m3	t0,960	2	9999	29	1263
Bar	16.7%	30/30m2;h3.3m	5/100m3	t240,120	1	4070	12	514
Coffee room (choir, clubs)	6.7%	30/30m2;h3.3m	5/100m3	t60,120	1	3460	10	437
Ferrets in sleeping room		2/20m3	0.02/20m3	t0, 960	0.1	1823	5	230
Minks farm, person-equivalent	0.5	20/25m2; 4m	10/100m3	t2760,120	20	1552	4	194
Restaurant inside full	6.7%	30/30m2;h3.3m	2/100m3	t60/120	1	1384	4	175
Long Term care dining room	0.5	10/30m2;h3.3m	5/100m3	t60,120	5	966	3	122
Patient ward visitor morning	0.1	10/30m2;h3.3m	1/100m3	t600,120	1	946	3	119
Bus, metro commuting, busy, long	12.5%	40/40m2;2.5m	5/100m3	t0,120	5	857	2	108
Sitting room	0.2	5/30m2;h3.3m	1/100m3	t240,120	1	814	2	103
Person car ventilation low, not off	0.5	4/10m3	2/10m3	t0,240	20	806	2	102
Airplane, long distance (SI-W1)	0.1	10/3m2;2.2m	1/20m3	t0,960	60	802	2	101
Dining room, guests, full	0.2	15/30m2;h3.3m	3/100m3	t0,120	5	514	1	65
Church	0.02	50/200m2;10m	1/100m3	t0,240	1	374	1	47
Train compartment	3.3%	6/8m2;h2.5m	0.2/20m3	t0,240	5	369	1	47
Airplane, short distance (SI-W1)	0.1	10/3m2;2.2m	1/20m3	t0,120	20	243	0.69	31
Office room	2.5%	5/30m2;h3.3m	2.5/100m3	t0,960	10	233	0.67	29
Shop, ill ventilated	0.5	5/30m2;h3.3m	2.5/100m3	t60/15	0.5	228	0.65	29
Bar	6.7%	30/30m2;h3.3m	2/100m3	t60/120	10	200	0.57	25
Dining room, small family	0.2	5/30m2;h3.3m	1/100m3	t0,120	5	171	0.49	22
Sitting room	0.2	5/30m2;h3.3m	1/100m3	t0,120	5	171	0.49	22
Coffee room (choir, clubs)	6.7%	30/30m2;h3.3m	5/100m3	t60/15	5	118	0.34	15
Terrace outside, exhales & wind		2 exhalers, row	175cm aft. nr1	240 min.	1000L	118	0.34	15
Terrace outside, exhales & wind		2 exhalers, row	2m after nr1	240 min.	1000L	108	0.31	14
Restaurant inside full	3.3%	30/30m2;h3.3m	1/100m3	t60,120	10	100	0.29	13
Shopping mall,	0.04	5/30m2;h3.3m	0.2/100m3	t60/120	2	86	0.25	11
Dressing room (sport, etc.)	0.33	15/30m2;h3.3m	5/100m3	t0,15	1	52	0.15	7
Church (high building)	0.02	50/200m2;10m	1/100m3	t0,120	5	51	0.15	6
Meeting room	2.5%	10/30m2;h3.3m	2.5/100m3	t0,120	5	43	0.12	5
Bus, metro commuting, few	0.05	40/40m2;2.5m	2/100m3	t60,15	2	40	0.11	5
Terrace outside "room model"	HL30	100/100m2	5/500m3	t0,240	60	33	0.094	4
Exhales normal face-to-face	better use room model		100cm	100x, 6 min.		25	0.071	3
Person car ventilation medium	0.5	4/10m3	2/10m3	t0,15	40	22	0.064	3
Health club, groups	0.08	25/250m2;h4m	2/1000m3	t0,120	10	19	0.053	2
Terrace outside, exhales & wind		2 exhal. in row	10m after nr1	240 min.	1000L	18	0.051	2
Supermarket, well-ventilated	0.06	10/30m2;h3.3m	2.5/100m3	t60/15	10	8	0.023	1
Train compartment	3.3%	6/8m2;h2.5m	0.2/20m3	t0,15	20	5	0.014	0.63
Exhale cough-sneeze full inhale	burst + 10 degr. cone		100cm	5x		1.47	0.0042	0.19
Platform railway/bus, exhales		50/100m2	75cm distance	6 min.	25L	0.18	0.0005	0.023
Legenda
below low infectious dose (< 100)	high infectious dose (350 - 1000)
low infectious dose (100 - 350)	extreme infectious dose (> 1000)
